# Supplementary material for: Aptamer-functionalized CdTe:Zn2+ quantum dots for the detection of tomato systemin
Source: Royal Society of Chemistry journal article supplement (doi:10.1039/c5ay01728a), 2015-01-01
Supplement: c5ay01728a1.pdf [file c5ay01728a1.pdf]

## Supporting Information

# Aptamer-Functionalized CdTe:Zn<sup>2+</sup> Quantum Dots for the Detection of Tomato Systemin

Chen Liu<sup>a</sup>, Guobin Mao<sup>a</sup>, Chen Su<sup>a</sup>, Xinghu Ji<sup>a</sup>, Zilin Chen<sup>b</sup>, Zhike He<sup>\*a</sup>

<sup>a</sup> Key Laboratory of Analytical Chemistry for Biology and Medicine (Ministry of Education), College of Chemistry and Molecular Sciences, Wuhan University, Wuhan 430072, P. R. China

<sup>b</sup> School of Pharmaceutical Sciences, Wuhan University, Wuhan, 430071, China

\* Corresponding author

Tel: +86 27-68756557; fax: +86 27-68754067.

*E-mail addresses: zhkhe@whu.edu.cn (Z. He)*

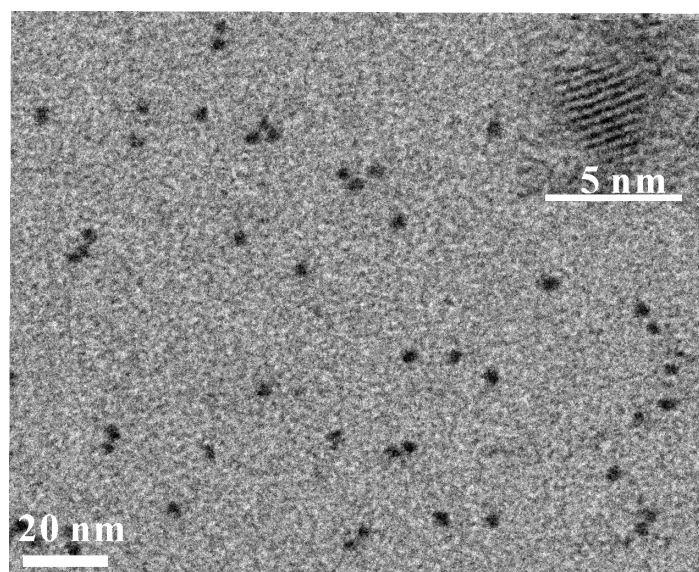

Figure S1. TEM image of QDs (inset: the HRTEM image).

Figure S2. Effects of incubation time for detection of 1.17  $\mu\text{M}$  target TomSys.
